# Supplementary material
Source: PubMed Central journal article supplement (PMC555966)
Supplement: pnas_102_14_5256__1.pdf [file pnas_102_14_5256__1.pdf]

## Supporting Methods

**Calculations and Statistics.** Analysis of the time course of substrate accumulation was based on a one-compartment model described in ref. 1. Analysis of saturation curves and calculations of  $K_i$  values are reported in ref. 2. Fitted parameters such as  $K_m$  and  $K_i$  are given as geometric mean with a 95% confidence interval. Arithmetic means are given with SEMs.

The efflux of ET (Fig. 5) was described with a simple exponential:  $rc = 100\% * (e^{-k * t})$ . The efflux of stachydrine had to be modeled with two coupled differential equations:  $dA/dt = B * k_{21} - A * k_{12}$  and  $dB/dt = A * k_{12} + C * k_{32} - B * (k_{21} + k_{23})$ , where  $A$  and  $B$  represent two distinct intracellular states of stachydrine and  $C$  represents extracellular stachydrine. Velocity of uptake of ET as a function of  $Na^+$  concentration (Fig. 6) could be described with a modified Hill function:  $v = V_0 + V_{lim}/(1 + K * c_{Na^+}^{-h})$ , where  $h$  is the Hill coefficient and  $c_{Na^+}$  is the sodium concentration. For stachydrine, a model of competitive inhibition was used:  $v = V_0/(1 + c_{Na^+}/K_i)$ . Velocity of uptake as a function of pH (Fig. 7) could be described with  $v = V_{max} * (10^{-pH}/(10^{-pH} + K_a)) * S/(K_m + S)$ , where  $K_a$  is the acid dissociation constant and  $S$  is the substrate concentration. This function is based on the assumptions that (i) only  $V_{max}$  is affected by pH changes ( $v = V_{max} * \alpha * S/(K_m + S)$ ) and (ii) only the protonated transporter ( $TH^+$ ) is active in transport ( $K_a = H^+ * T/TH^+$ ;  $\alpha = TH^+/(TH^+ + T) = H^+/(H^+ + K_a)$ ).

**Drugs.** Radiotracers (all from ARC, St. Louis) were as follows: 3-*O*-acetyl-L-carnitine ( $^3H$ , 2.96 kBq/pmol; ART-739), L-carnitine ( $^3H$ , 2.96 kBq/pmol; ART-739), glycine betaine ( $^{14}C$ , 1.85 Bq/pmol, ARC-1432), L-histidine ( $^3H$ , 1.48 kBq/pmol, ART-234), 4-hydroxy-L-proline ( $^3H$ , 0.555 kBq/pmol, ART-231), L-proline ( $^3H$ , 3.33 kBq/pmol, ART-475), and tetraethylammonium ( $^{14}C$ , 2.04 Bq/pmol, ARC-577).

Unlabeled compounds were as follows: betonicine (0605, Extrasynthese, Genay, France),  $\gamma$ -butyryl betaine hydrochloride (403245, Sigma-Aldrich), L-(+)-ergothioneine (F-3455, Bachem), *N*-methyl-L-proline monohydrate (306843, Sigma-Aldrich), stachydrine hydrochloride (0604, Extrasynthese), 1-methyl-4-phenylpyridinium iodide (D-048, Sigma-Aldrich). All other chemicals were at least of analytical grade.

1. Russ, H., Gliese, M., Sonna, J. & Schömig, E. (1992) *Naunyn-Schmiedeberg's Arch. Pharmacol.* **346**, 158-165.
2. Schömig, E., Babin-Ebell, J. & Russ, H. (1993) *Naunyn-Schmiedeberg's Arch. Pharmacol.* **347**, 379-383.
